# Supplementary material
Source: PubMed Central journal article supplement (PMC11036309)
Supplement: jama-e245003-s002.pdf [file jama-e245003-s002.pdf]

## Data Sharing Statement

Dixit. Preoperative GLP-1 Receptor Agonist Use and Risk of Postoperative Respiratory Complications. *JAMA*. Published April 22, 2024. doi:10.1001/jama.2024.5003

### Data

**Data available:** No

### Additional Information

**Explanation for why data not available:** In accordance with our data use agreement, data cannot be publicly shared.
